# Supplementary material for: Simultaneous combination of MS2 workflows for pesticide multiresidue analysis with LC-QOrbitrap
Source: Royal Society of Chemistry journal article supplement (doi:10.1039/c7ay00480j), 2017-01-01
Supplement: c7ay00480j1.pdf [file c7ay00480j1.pdf]

Electronic supplementary information

**Simultaneous combination of MS2 workflows for pesticides multiresidue  
analysis with LC-QOrbitrap**

*Łukasz Rajski, María del Mar Gómez-Ramos, Amadeo R. Fernández-Alba*

European Union Reference Laboratory for Pesticide Residues in Fruit & Vegetables. University of Almería, Agrifood Campus of International Excellence (ceiA3) Department of Hydrogeology and Analytical Chemistry, University of Almería, Ctra. Sacramento S/Nº, La Cañada de San Urbano, 04120, Almería, Spain. amadeo@ual.es +34 950 015 034

Supplementary Table 1 Non-target pesticides

| Pesticide          | Precursor | Fragments |          |          |          |          |          |  |
|--------------------|-----------|-----------|----------|----------|----------|----------|----------|--|
| Acetochlor         | 270.1255  | 224.0837  | 148.1121 | 90.0105  | 59.0494  |          |          |  |
| Alachlor           | 270.1255  | 238.0993  | 224.0837 | 220.0888 | 208.0888 | 162.1278 | 90.0105  |  |
| Ametryn            | 228.1277  | 186.0808  | 96.0556  | 91.0324  |          |          |          |  |
| Anilofos           | 368.0305  | 198.9649  | 188.9805 | 170.9699 | 142.9928 |          |          |  |
| Atrazine           | 216.1011  | 174.0542  | 132.0324 | 104.0010 | 96.0556  |          |          |  |
| Atrazine-Desethyl  | 188.0698  | 146.0229  | 110.0462 | 104.0010 | 79.0058  | 68.0244  |          |  |
| Azamethiphos       | 324.9809  | 182.9958  | 170.9957 | 139.0059 | 127.9899 |          |          |  |
| Azinphos-ethyl     | 346.0444  | 232.9491  | 137.0056 | 132.0444 | 114.9614 |          |          |  |
| Bensulfuron-methyl | 411.0969  | 213.0331  | 182.0563 | 156.0770 | 149.0599 | 119.0493 |          |  |
| Bromacil           | 261.0233  | 204.9608  | 187.9342 | 161.9549 |          |          |          |  |
| Buturon            | 237.0789  | 84.0807   | 58.0654  | 53.0389  |          |          |          |  |
| Cambendazole       | 303.0910  | 214.0542  | 261.0441 |          |          |          |          |  |
| Carbetamide        | 237.1234  | 192.0656  | 120.0445 | 118.0863 | 72.0808  |          |          |  |
| Chlorbromuron      | 292.9687  | 203.9211  | 182.0242 | 62.0603  |          |          |          |  |
| Chloridazon        | 222.0429  | 146.0116  | 104.0495 | 92.0494  |          |          |          |  |
| Chloroxuron        | 291.0895  | 218.0369  | 164.0946 | 72.0444  |          |          |          |  |
| Chromafenozide     | 395.2329  | 175.0754  | 133.0648 |          |          |          |          |  |
| Cinosulfuron       | 414.1078  | 215.0373  | 183.0514 | 157.0721 | 141.0005 | 121.0285 | 59.0494  |  |
| Clethodim          | 360.1395  | 206.1178  | 166.0865 | 164.0707 | 129.0385 |          |          |  |
| Cyanazine          | 241.0963  | 214.0855  | 205.1198 | 174.0542 | 104.0010 | 96.0556  |          |  |
| Diafenthiuron      | 385.2308  | 329.1685  | 312.1419 | 287.1215 | 278.1542 | 270.1854 | 228.1386 |  |
| Dialifos           | 394.0098  | 208.0159  | 187.0010 | 158.9698 | 130.9385 | 114.9613 |          |  |
| Diclobutrazol      | 328.0978  | 199.0077  | 158.9763 | 70.0400  | 59.0494  |          |          |  |

|                     |          |          |          |          |          |          |          |  |
|---------------------|----------|----------|----------|----------|----------|----------|----------|--|
| Difenoxyuron        | 287.1390 | 214.0863 | 123.0441 | 95.0492  | 72.0444  |          |          |  |
| Diflufenican        | 395.0814 | 284.0532 | 266.0426 | 246.0364 |          |          |          |  |
| Dimefuron           | 339.1218 | 295.1321 | 256.0484 | 167.0008 | 72.0444  |          |          |  |
| Dimethylvinphos, Z- | 330.9455 | 204.9375 | 169.9686 | 145.0262 | 127.0156 | 98.9842  |          |  |
| Dodemorph           | 282.2791 | 116.1070 | 98.0965  | 83.0855  | 69.0700  |          |          |  |
| Edifenphos          | 311.0324 | 283.0011 | 219.9926 | 190.9927 | 140.9828 | 111.0263 |          |  |
| Ethiofencarb        | 226.0896 | 164.0704 | 107.0490 | 91.0541  | 79.0541  |          |          |  |
| Ethiprole           | 396.9899 | 350.9483 | 319.9840 | 254.9698 |          |          |          |  |
| Etrimfos            | 293.0719 | 265.0406 | 233.0144 | 142.9927 |          |          |          |  |
| Fenbendazole        | 300.0801 | 268.0536 | 190.0068 | 159.0426 | 109.0106 |          |          |  |
| Fenfuram            | 202.0863 | 120.0444 | 109.0285 | 94.0651  | 92.0495  | 83.0491  |          |  |
| Fenoxaprop-ethyl    | 362.0790 | 288.0424 | 244.0526 | 238.0501 | 119.0493 |          |          |  |
| Fenpropidin         | 274.2529 | 147.1169 | 86.0964  | 57.0700  |          |          |          |  |
| Fenuron             | 165.1022 | 120.0444 | 95.0491  | 92.0494  | 72.0444  |          |          |  |
| Flamprop-methyl     | 336.0797 | 105.0336 | 95.0492  | 53.0390  |          |          |          |  |
| Flazasulfuron       | 408.0584 | 301.0909 | 227.0098 | 182.0562 | 156.0770 |          |          |  |
| Fluacrypyrim        | 427.1475 | 205.0859 | 145.0648 |          |          |          |          |  |
| Fluazifop-Butyl     | 384.1417 | 328.0789 | 282.0735 | 254.0785 |          |          |          |  |
| Fluometuron         | 233.0896 | 168.0257 | 72.0445  |          |          |          |          |  |
| Fluridone           | 330.1100 | 310.1038 | 309.0963 |          |          |          |          |  |
| Fonofos             | 247.0375 | 200.9955 | 155.0290 | 137.0185 | 126.9977 | 108.9872 |          |  |
| Forchlorfenuron     | 248.0585 | 155.0007 | 129.0214 | 111.0553 | 94.0651  |          |          |  |
| Fuberidazole        | 185.0709 | 157.0761 | 156.0683 | 92.0494  |          |          |          |  |
| Furathiocarb        | 383.1635 | 326.1423 | 252.0691 | 195.0477 | 177.0371 | 180.0691 | 167.0528 |  |
| Heptenophos         | 251.0235 | 215.0470 | 127.0156 | 125.0155 | 89.0386  |          |          |  |
| Imazapyr            | 262.1186 | 220.0716 | 217.0971 | 202.0611 | 86.0964  |          |          |  |
| Imazaquin           | 312.1343 | 284.1396 | 270.0874 | 267.1129 | 199.0504 | 86.0964  |          |  |
| Isazofos            | 314.0490 | 272.0024 | 171.0242 | 162.0432 | 119.9961 |          |          |  |
| Isofenphos          | 346.1236 | 245.0036 | 234.9828 | 216.9723 | 137.0058 | 121.0285 |          |  |
| Isofenphos-oxon     | 330.1465 | 229.0261 | 219.0053 | 200.9948 | 121.0283 |          |          |  |
| Isoproturon         | 207.1492 | 165.1027 | 162.0917 | 72.0446  |          |          |          |  |
| Lenacil             | 235.1441 | 153.0660 | 136.0395 | 83.0855  |          |          |          |  |
| Mebendazole         | 296.1030 | 264.0765 | 105.0331 | 77.0381  |          |          |          |  |
| Mecarbam            | 330.0593 | 226.9960 | 199.0012 | 170.9698 | 116.0343 | 114.9614 |          |  |
| Metamitron          | 203.0927 | 175.0979 | 104.0495 |          |          |          |          |  |
| Metazachlor         | 278.1055 | 210.0680 | 134.0964 | 105.0699 | 76.9788  |          |          |  |
| Metolachlor         | 284.1412 | 252.1150 | 212.0837 | 176.1434 | 73.0648  |          |          |  |
| Metosulam           | 418.0138 | 354.0521 | 228.0313 | 189.9822 | 174.9952 | 140.0262 |          |  |
| Metoxuron           | 229.0738 | 184.0161 | 156.0211 | 72.0444  |          |          |          |  |
| Metribuzin          | 215.0961 | 187.1013 | 148.0632 | 131.0388 | 89.0168  | 84.0808  |          |  |
| Metsulfuron-methyl  | 382.0816 | 313.9920 | 209.9858 | 199.0062 | 167.0566 | 141.0772 | 127.0156 |  |
| Mevinphos           | 225.0523 | 193.0262 | 127.0155 | 99.0441  | 67.0180  |          |          |  |
| Monolinuron         | 215.0582 | 148.0632 | 126.0106 | 62.0603  |          |          |          |  |
| Monuron             | 199.0633 | 171.0805 | 154.0055 | 126.0106 | 72.0444  |          |          |  |
| Naled               | 378.7899 | 314.9000 | 252.7816 | 173.8634 | 144.9816 | 127.0155 | 91.6972  |  |

|                        |          |          |          |          |          |          |          |          |
|------------------------|----------|----------|----------|----------|----------|----------|----------|----------|
| Napropamide            | 272.1645 | 199.0757 | 171.0807 | 129.1151 | 100.1123 | 74.0965  | 72.0809  |          |
| Nuarimol               | 315.0695 | 252.0819 | 243.0372 | 138.9945 | 81.0447  |          |          |          |
| Ofurace                | 282.0892 | 254.0942 | 236.0837 | 224.0837 | 160.1121 |          |          |          |
| Oxycarboxin            | 268.0638 | 193.0166 | 175.0060 | 164.9853 | 120.0444 | 146.9747 |          |          |
| Paraoxon ethyl         | 276.0632 | 220.0002 | 248.0318 | 238.0111 |          |          |          |          |
| Paraoxon methyl        | 248.0319 | 127.0155 | 202.0388 | 89.0391  | 90.0469  |          |          |          |
| Phosphamidon           | 300.0762 | 226.9871 | 174.0682 | 127.0155 | 100.0757 |          |          |          |
| Picolinafen            | 377.0908 | 359.0804 | 284.0531 | 256.0582 |          |          |          |          |
| Picoxystrobin          | 368.1104 | 205.0863 | 177.0913 | 173.0600 | 117.0700 | 115.0543 |          |          |
| Promecarb              | 208.1332 | 151.1119 | 119.0605 | 109.0649 | 91.0543  |          |          |          |
| Prometryn              | 242.1434 | 200.0966 | 158.0497 |          |          |          |          |          |
| Propachlor             | 212.0837 | 170.0371 | 152.0265 | 106.0653 | 94.0653  | 91.0544  |          |          |
| Propaphos              | 305.0971 | 263.0496 | 239.0132 | 221.0027 | 202.9922 | 141.0367 |          | 56.0498  |
| Propaquizafop          | 444.1321 | 444.1321 | 371.0794 | 299.0583 | 144.1020 | 100.0757 | 70.0652  |          |
| Propazine              | 230.1167 | 188.0699 | 146.0229 | 104.0010 | 79.0058  |          |          |          |
| Prosulfocarb           | 252.1417 | 128.1072 | 91.0542  | 86.0602  | 65.0389  |          |          |          |
| Pyrazophos             | 374.0934 | 346.0623 | 238.0646 | 222.0874 | 194.0563 | 176.0457 | 114.9614 |          |
| Pyridaphenthion        | 341.0719 | 313.0405 | 205.0431 | 189.0658 | 114.9613 |          |          |          |
| Pyrifenox              | 295.0399 | 263.0138 | 93.0573  |          |          |          |          |          |
| Pyrimidifen            | 378.1943 | 184.0636 | 157.0401 | 150.1025 |          |          |          |          |
| Quinalphos             | 299.0614 | 242.9988 | 163.0325 | 147.0553 | 114.9613 |          |          |          |
| Sulfosulfuron          | 471.0751 | 261.0287 | 236.0334 | 211.0535 | 156.0768 |          |          | 125.0420 |
| Sulprofos              | 323.0358 | 295.0044 | 265.0116 | 236.9803 | 218.9698 | 157.0141 | 154.9983 |          |
| Terbumeton             | 226.1662 | 170.1036 | 142.0724 | 114.0662 | 100.0505 | 75.0553  |          |          |
| Terbutylazine-desethyl | 202.0854 | 146.0228 | 104.0010 | 110.0461 | 79.0057  | 68.0243  |          |          |
| Tetrachlorvinphos      | 364.9065 | 238.8985 | 203.9297 | 127.0156 |          |          |          |          |
| Thifensulfuron-methyl  | 388.0380 | 222.9731 | 204.9626 | 167.0565 | 141.0772 |          |          |          |
| Thiophanate            | 371.0842 | 282.0363 | 235.9945 | 206.0923 | 160.0505 | 151.0324 | 59.9905  |          |
| Tolfenpyrad            | 384.1473 | 197.0965 | 171.0323 | 145.0530 |          |          |          |          |
| Triasulfuron           | 402.0633 | 236.9984 | 167.0565 | 141.0772 | 137.0057 | 121.0285 |          |          |
| Tribenuron-methyl      | 396.0972 | 364.0712 | 350.0162 | 181.0721 | 155.0928 | 135.0442 |          |          |
| Tricyclazole           | 190.0433 | 163.0313 | 136.0216 | 109.0106 |          |          |          |          |
| Vamidotion             | 288.0488 | 146.0634 | 118.0321 | 86.0600  | 58.0654  |          |          |          |

Supplementary Table 2 Target pesticides

| Pesticide          | Precursor | Fragments |          |          |          |          |         |  | RT   |
|--------------------|-----------|-----------|----------|----------|----------|----------|---------|--|------|
|                    |           |           |          |          |          |          |         |  |      |
| Acephate           | 184.0192  | 142.9927  | 128.9770 | 112.9998 |          |          |         |  | 3.07 |
| Acetamidrid        | 223.0745  | 149.0235  | 126.0106 | 56.0498  |          |          |         |  | 4.54 |
| Aldicarb           | 213.0668  | 116.0529  | 101.0295 | 89.0426  | 70.0659  | 68.0497  | 61.0110 |  | 4.92 |
| Aldicarb-sulfone   | 223.0747  | 148.0427  | 86.0607  | 81.0012  | 76.0401  | 62.9908  | 59.0501 |  | 3.65 |
| Aldicarb-sulfoxide | 207.0798  | 132.0479  | 89.0426  | 73.0649  | 69.0582  | 65.0056  |         |  | 3.53 |
| Azinphos-methyl    | 318.0131  | 167.0162  | 142.9927 | 132.0445 | 105.0336 | 104.0495 |         |  | 6.9  |
| Azoxystrobin       | 404.1241  | 372.0980  | 344.1031 | 329.0795 | 172.0393 |          |         |  | 7.01 |

|                           |          |          |          |          |          |          |          |  |           |
|---------------------------|----------|----------|----------|----------|----------|----------|----------|--|-----------|
| Bifenazate                | 301.1547 | 198.0918 | 170.0968 | 153.0702 |          |          |          |  | 7.72      |
| Bitertanol                | 338.1863 | 269.1536 | 251.1431 | 171.0805 | 99.0804  | 70.0400  | 57.0702  |  | 8.86      |
| Boscalid                  | 343.0399 | 307.0634 | 272.0935 | 271.0867 | 139.9899 |          |          |  | 7.3       |
| Bromuconazole             | 375.9414 | 306.9286 | 227.0024 | 172.9556 | 158.9763 | 70.0400  |          |  | 7.70,8.42 |
| Bupirimate                | 317.1642 | 272.1068 | 237.2077 | 210.1604 | 166.0978 |          |          |  | 7.79      |
| Buprofezin                | 306.1635 | 201.1058 | 116.0529 | 106.0652 | 57.0702  |          |          |  | 9.63      |
| Carbaryl                  | 145.0648 | 155.0606 | 127.0543 | 122.0194 | 117.0700 | 115.0544 | 103.0543 |  | 5.82      |
| Carbendazim               | 192.0768 | 160.0506 | 132.0557 |          |          |          |          |  | 4.01      |
| Carbofuran                | 222.1125 | 165.0912 | 137.0599 | 123.0441 | 119.0857 | 55.0546  |          |  | 5.42      |
| Chlorantraniliprole       | 481.9781 | 450.9361 | 283.9222 | 279.0087 | 194.0004 | 190.9451 |          |  | 6.66      |
| Chlorfenvinphos, B-       | 358.9768 | 204.9375 | 155.0469 | 127.0156 | 98.9842  | 349.9336 |          |  | 8.62      |
| Chlorpyrifos              | 349.9336 | 293.8709 | 197.9276 | 171.0240 | 114.9614 |          |          |  | 10.15     |
| Chlorpyrifos-methyl       | 321.9023 | 289.8761 | 142.9928 | 127.0155 |          |          |          |  | 9.21      |
| Clofentezine              | 303.0199 | 256.8833 | 156.0210 | 138.0105 | 130.0400 |          |          |  | 9.29      |
| Clomazone                 | 240.0786 | 128.0708 | 125.0155 | 89.0386  |          |          |          |  | 6.83      |
| Clothianidin              | 250.016  | 169.0543 | 131.9670 | 113.0168 |          |          |          |  | 4.3       |
| Coumaphos                 | 363.0217 | 334.9906 | 306.9593 | 288.9487 | 226.9929 | 211.0158 |          |  | 8.79      |
| Cyazofamid                | 325.0521 | 261.0903 | 225.1136 | 217.0403 | 108.0114 |          |          |  | 8.08      |
| Cymoxanil                 | 199.0826 | 147.0400 | 129.0294 | 111.0189 | 83.0245  |          |          |  | 4.6       |
| Cyproconazole             | 292.1211 | 138.9947 | 125.0155 | 70.0402  |          |          |          |  | 7.42,7.69 |
| Cyprodinil                | 226.1339 | 210.1025 | 108.0808 | 93.0573  |          |          |          |  | 8.42      |
| Cyromazine                | 167.104  | 125.0824 | 85.0510  | 83.0605  | 60.0560  |          |          |  | 2.32      |
| Demeton-S-Methyl-Sulfone  | 263.0171 | 230.9910 | 169.0084 | 142.9927 | 127.0155 | 121.0318 |          |  | 3.89      |
| Demeton-S-methylsulfoxide | 247.0222 | 169.0083 | 142.9927 | 127.0155 | 105.0369 |          |          |  | 3.83      |
| Diazinon                  | 305.1083 | 169.0797 | 153.1025 | 114.9616 |          |          |          |  | 8.62      |
| Dichlorvos                | 220.9532 | 127.0149 |          |          |          |          |          |  | 5.42      |
| Dicrotophos               | 238.0839 | 193.0264 | 127.0157 | 112.0759 | 72.0445  |          |          |  | 4.12      |
| Diethofencarb             | 268.1543 | 198.0761 | 180.1019 | 152.0706 | 124.0393 |          |          |  | 6.88      |
| Difenoconazole            | 406.072  | 337.0394 | 264.9817 | 251.0026 |          |          |          |  | 9.2       |
| Diffubenzuron             | 311.0393 | 159.9692 | 158.0413 | 141.0147 | 114.9614 |          |          |  | 8.32      |
| Dimethoate                | 230.0069 | 198.9649 | 170.9699 | 142.9928 | 124.9822 | 88.0216  |          |  | 4.45      |
| Dimethomorph              | 388.131  | 301.0629 | 165.0549 | 114.0551 |          |          |          |  | 7.15,7.43 |
| Diniconazole              | 326.0821 | 308.0715 | 252.0090 | 158.9763 | 70.0399  |          |          |  | 9.05      |
| Diuron                    | 233.0243 | 187.9664 | 159.9715 | 72.0444  |          |          |          |  | 6.65      |
| Dodine                    | 228.2434 | 186.2217 | 71.0863  | 60.0566  | 57.0708  |          |          |  | 9.17      |
| Emamectin B1a             | 886.5311 | 302.1966 | 158.1178 | 126.0915 | 82.0652  |          |          |  | 10.14     |
| Epoxiconazole             | 330.0804 | 141.0103 | 123.0242 | 121.0449 | 70.0401  |          |          |  | 8.05      |
| Ethion                    | 384.9949 | 199.0013 | 170.9699 | 142.9387 | 114.9614 |          |          |  | 9.97      |
| Ethirimol                 | 210.1601 | 193.1336 | 182.1289 | 140.1070 | 98.0600  |          |          |  | 4.89      |
| Ethoprophos               | 243.0637 | 215.0324 | 201.0167 | 172.9855 | 130.9385 | 114.9614 |          |  | 7.89      |
| Etofenprox                | 394.2377 | 359.2005 | 305.1535 | 183.0805 | 177.1274 | 135.0804 | 107.0491 |  | 11.53     |
| Famoxadone                | 392.1605 | 331.1440 | 238.1100 | 195.0805 | 146.0601 | 93.0573  |          |  | 8.76      |
| Fenamidone                | 312.1165 | 264.1132 | 236.1183 | 165.0482 | 103.0542 | 92.0495  |          |  | 7.11      |
| Fenamiphos                | 304.1131 | 276.0819 | 262.0662 | 234.0349 | 217.0084 |          |          |  | 8.16      |
| Fenamiphos-sulfone        | 336.1029 | 308.0718 | 266.0249 | 188.0473 |          |          |          |  | 5.61      |

|                      |           |          |          |          |          |          |          |          |       |
|----------------------|-----------|----------|----------|----------|----------|----------|----------|----------|-------|
| Fenamiphos-sulfoxide | 320.108   | 292.0767 | 251.0138 | 171.0475 |          |          |          |          | 5.48  |
| Fenarimol            | 331.0399  | 304.0294 | 268.0527 | 259.0079 | 81.0448  |          |          |          | 7.85  |
| Fenazaquin           | 307.1805  | 161.1325 | 147.0553 | 57.0702  |          |          |          |          | 11.33 |
| Fenbuconazole        | 337.1215  | 194.0481 | 136.0482 | 125.0153 | 70.0400  |          |          |          | 8.14  |
| Fenhexamid           | 302.0709  | 142.0057 | 97.1013  | 55.0546  |          |          |          |          | 7.71  |
| Fenoxycarb           | 302.1387  | 256.0968 | 211.0754 | 116.0706 | 88.0393  |          |          |          | 8.3   |
| Fenpropathrin        | 350.1751  | 134.0965 | 129.0170 | 125.0962 | 97.1012  |          |          |          | 10.49 |
| Fenpropimorph        | 304.2635  | 147.1170 | 130.1229 | 116.1072 | 57.0703  |          |          |          | 7.00  |
| Fenpyrazamine        | 290.09574 | 272.1757 | 231.1367 | 230.1289 | 216.1131 | 189.0896 | 131.0730 | 225.0426 | 7.57  |
| Fenpyroximate        | 422.2074  | 422.2074 | 366.1451 | 231.1004 | 215.1055 | 214.0976 | 138.0663 |          | 10.69 |
| Fenthion             | 279.0273  | 247.0011 | 231.0240 | 169.0141 | 149.0234 | 142.9927 |          |          | 8.65  |
| Fenthion-sulfone     | 311.0171  | 142.9928 | 137.0421 |          |          |          |          |          | 5.9   |
| Fenthion-sulfoxide   | 295.0222  | 279.9987 | 278.0194 | 264.0038 | 232.0317 |          |          |          | 5.76  |
| Flonicamid           | 230.0536  | 203.0430 | 176.0321 | 174.0164 | 148.0371 |          |          |          | 3.83  |
| Flufenacet           | 364.0737  | 152.0505 | 124.0558 | 109.0451 |          |          |          |          | 7.84  |
| Flufenoxuron         | 489.0435  | 487.0290 | 141.0146 | 158.0412 |          |          |          |          | 10.44 |
| Fluopyram            | 397.0537  | 208.0137 | 190.0475 | 173.0210 | 170.0413 |          |          |          | 7.71  |
| Fluquinconazole      | 376.0163  | 349.0057 | 324.9943 | 306.9838 | 272.0150 | 123.9950 | 108.0243 |          | 7.78  |
| Flusilazole          | 316.1076  | 187.0585 | 165.0699 | 95.0491  |          |          |          |          | 8.27  |
| Flutriafol           | 302.11    | 233.0775 | 137.0399 | 123.0242 | 109.0450 | 70.0401  |          |          | 6.19  |
| Formetanate          | 222.1237  | 165.1024 | 120.0445 |          |          |          |          |          | 3.43  |
| Fosthiazate          | 284.0539  | 227.9915 | 199.9602 | 119.9938 | 104.0165 |          |          |          | 5.93  |
| Haloxypop            | 362.0402  | 316.0347 | 288.0371 | 91.0542  | 272.0073 |          |          |          | 8.24  |
| Hexaconazole         | 314.0821  | 184.9923 | 158.9766 | 70.0401  |          |          |          |          | 8.73  |
| Hexythiazox          | 353.1085  | 271.0305 | 228.0246 | 194.0370 | 168.0577 |          |          |          | 10.13 |
| Imazalil             | 297.0556  | 255.0086 | 200.9869 | 158.9764 | 69.0448  |          |          |          | 6.17  |
| Imidacloprid         | 256.0596  | 212.0585 | 209.0588 | 175.0979 | 84.0556  |          |          |          | 4.28  |
| Indoxacarb           | 528.078   | 496.0530 | 293.0329 | 249.0429 | 218.0428 | 190.0058 | 168.0214 | 150.0109 | 9.25  |
| Iprovalicarb         | 321.2173  | 203.1392 | 186.1126 | 144.0656 | 119.0856 | 116.0707 | 91.0542  | 72.0808  | 7.7   |
| Isocarbophos         | 230.9875  | 216.9722 | 137.0058 | 121.0285 |          |          |          |          | 8.35  |
| Isofenfos methyl     | 332.108   | 273.0345 | 230.9868 | 121.0248 | 198.9601 | 171.0205 |          |          | 8.35  |
| Isoprocab            | 194.1176  | 162.0573 | 152.0707 | 137.0962 | 95.0496  |          |          |          | 6.17  |
| Isoxaflutole         | 360.0512  | 250.9985 | 69.0336  | 159.0427 | 278.0434 | 78.9859  | 108.0455 |          | 6.39  |
| Kresoxim-methyl      | 314.1387  | 282.1124 | 267.1015 | 235.0752 | 222.0912 | 132.0807 | 131.0729 | 116.0494 | 8.35  |
| Linuron              | 249.0192  | 182.0245 | 159.9719 | 132.9608 | 62.0604  | 60.0448  |          |          | 7.23  |
| Lufenuron            | 510.9857  | 327.9725 | 236.0117 | 158.0413 | 141.0147 | 87.0441  |          |          | 10.12 |
| Malaoxon             | 315.0662  | 99.0077  | 127.0390 | 142.9926 | 173.0808 | 269.0243 |          |          | 5.46  |
| Malathion            | 331.0433  | 285.0015 | 257.0065 | 210.9648 | 142.9927 | 127.0390 | 99.0077  |          | 7.4   |
| Mandipropamid        | 412.131   | 356.1050 | 328.1101 | 204.1022 | 189.0912 | 125.0154 |          |          | 7.34  |
| Mepanipyrim          | 224.1182  | 209.0948 | 167.0703 | 123.0440 |          |          |          |          | 8.06  |
| Metalaxyl            | 280.1543  | 248.1281 | 220.1332 | 192.1383 | 160.1121 | 148.1121 |          |          | 6.28  |
| Metconazole          | 320.1524  | 177.0466 | 125.0153 | 70.0400  |          |          |          |          | 8.8   |
| Methidathion         | 145.0066  | 122.0194 | 103.0508 | 85.0397  | 71.0249  | 58.0297  |          |          | 6.65  |
| Methiocarb           | 226.0896  | 169.0683 | 121.0648 | 91.0542  |          |          |          |          | 7.15  |
| Methiocarb-sulfone   | 258.0795  | 201.0584 | 137.0600 | 122.0728 | 107.0493 |          |          |          | 4.56  |

|                        |          |          |          |          |          |          |          |          |       |
|------------------------|----------|----------|----------|----------|----------|----------|----------|----------|-------|
| Methiocarb-sulfoxide   | 242.0845 | 185.0631 | 170.0396 | 168.0603 | 153.0369 | 122.0726 |          |          | 4.36  |
| Methomyl               | 163.0536 | 106.0322 | 88.0216  | 72.9981  | 65.0058  | 58.0291  |          |          | 6.06  |
| Methoxyfenozide        | 369.2173 | 149.0597 | 133.0648 | 93.0699  | 91.0542  |          |          |          | 7.54  |
| Metobromuron           | 259.0077 | 169.9600 | 148.0631 | 62.0603  |          |          |          |          | 6.31  |
| Monocrotophos          | 224.0682 | 193.0263 | 127.0156 | 98.0601  | 58.0291  |          |          |          | 4     |
| Myclobutanil           | 289.1215 | 220.0888 | 151.0310 | 125.0153 | 70.0400  |          |          |          | 7.55  |
| Nitenpyram             | 271.0956 | 225.1027 | 196.0637 | 190.1339 | 130.0975 | 99.0917  | 86.0838  | 56.0498  | 3.74  |
| Omethoate              | 214.0297 | 196.0192 | 182.9876 | 154.9926 | 142.9926 | 61.0109  |          |          | 3.41  |
| Oxadixyl               | 279.1339 | 219.1129 | 133.0887 | 132.0809 | 119.0856 | 88.0393  |          |          | 5.05  |
| Oxamyl                 | 237.1016 | 192.1384 | 90.0550  | 72.0452  | 56.0134  |          |          |          | 3.7   |
| Paclobutrazol          | 294.1368 | 207.0936 | 139.0309 | 125.0153 | 87.0804  | 70.0400  | 57.0702  |          | 7.33  |
| Paraoxon methyl        | 248.0319 | 127.0155 | 202.0388 | 89.0391  | 90.0469  |          |          |          | 5.13  |
| Penconazole            | 284.0716 | 172.9921 | 158.9764 | 70.0401  |          |          |          |          | 8.53  |
| Pencycuron             | 329.1415 | 261.0790 | 218.0732 | 125.0153 |          |          |          |          | 9.07  |
| Pendimethalin          | 282.1448 | 194.0560 | 149.0584 | 118.0528 | 71.0862  |          |          |          | 10.28 |
| Phenthoate             | 321.0379 | 247.0013 | 163.0755 | 142.9929 | 135.0442 | 107.0492 | 91.0543  |          | 8.35  |
| Phosalone              | 367.9941 | 322.0064 | 181.9998 | 138.0103 | 110.9994 |          |          |          | 8.94  |
| Phosmet                | 318.0018 | 248.8919 | 160.0395 | 70.0401  | 133.0284 | 105.0335 | 77.0386  |          | 6.93  |
| Phoxim                 | 299.0614 | 129.0447 | 114.9614 | 105.0448 | 95.0492  |          |          |          | 8.88  |
| Pirimicarb             | 239.1503 | 195.1608 | 182.1291 | 72.0445  |          |          |          |          | 5.12  |
| Pirimicarb, desmethyl- | 225.1346 | 180.0767 | 168.1131 | 72.0444  |          |          |          |          | 4.2   |
| Pirimiphos-methyl      | 306.1036 | 278.0726 | 164.1185 | 142.9929 | 136.0872 | 108.0557 |          |          | 8.74  |
| Prochloraz             | 376.0381 | 308.0008 | 265.9538 | 194.9168 | 85.0886  | 70.0288  |          |          | 8.83  |
| Profenofos             | 372.9424 | 344.9114 | 302.8644 | 222.8980 | 206.9209 | 143.9797 | 128.0024 | 114.9614 | 9.58  |
| Propamocarb            | 189.1598 | 147.1129 | 144.1020 | 86.0964  | 74.0236  | 102.0549 |          |          | 3.47  |
| Propaquizafop          | 444.1321 | 371.0794 | 299.0583 | 144.1020 | 100.0757 | 70.0652  | 56.0498  |          | 9.76  |
| Propargite             | 368.189  | 231.1745 | 175.1119 | 107.0492 | 81.0699  | 57.0702  |          |          | 10.29 |
| Propiconazole          | 342.0771 | 204.9820 | 186.9714 | 158.9765 | 69.0700  |          |          |          | 8.68  |
| Propoxur               | 210.1125 | 168.0656 | 153.0911 | 111.0441 | 93.0335  | 65.0387  | 58.0291  |          | 5.36  |
| Propyzamide            | 256.0291 | 189.9822 | 172.9558 | 67.0544  | 65.0388  |          |          |          | 7.41  |
| Proquinazid            | 373.0408 | 330.9940 | 288.9470 | 271.9204 | 215.9308 | 162.0426 |          |          | 10.8  |
| Prothioconazole        | 344.0386 | 326.0282 | 189.0467 | 114.0122 | 102.0121 |          |          |          | 8.68  |
| Pymetrozine            | 218.1036 | 105.0448 | 79.0416  |          |          |          |          |          | 3.54  |
| Pyraclostrobin         | 388.1059 | 194.0813 | 163.0628 | 149.0473 | 133.0522 |          |          |          | 8.88  |
| Pyrethrini             | 329.2111 | 161.0960 | 143.0855 | 133.1011 | 69.0335  |          |          |          | 10.47 |
| Pyrethrini             | 373.201  | 161.0960 | 143.0855 | 133.1011 | 105.0698 | 69.0335  |          |          | 9.3   |
| Pyridaben              | 365.1449 | 309.0826 | 147.1170 | 132.0935 | 117.0699 |          |          |          | 10.95 |
| Pyridate               | 379.1242 | 351.1294 | 319.1573 | 207.0321 | 71.0856  | 57.0702  |          |          | 11.38 |
| Pyrimethanil           | 200.1182 | 183.0918 | 107.0604 | 82.0651  |          |          |          |          | 7.2   |
| Pyriproxyfen           | 322.1438 | 227.1066 | 185.0598 | 134.0726 | 96.0444  |          |          |          | 10.04 |
| Quinoclamine           | 208.016  | 180.0211 | 172.0392 | 137.0153 | 105.0335 |          |          |          | 5.46  |
| Quinoxifen             | 308.004  | 272.0272 | 213.9820 | 196.9793 |          |          |          |          | 10.37 |
| Rotenone               | 395.1489 | 213.0911 | 203.0704 | 192.0782 |          |          |          |          | 8.23  |
| Spinosyn A             | 732.4681 | 142.1226 | 98.0964  |          |          |          |          |          | 9.08  |
| Spinosyn D             | 746.4838 | 142.1226 | 98.0964  |          |          |          |          |          | 9.47  |

|                    |          |          |          |          |          |          |          |          |       |
|--------------------|----------|----------|----------|----------|----------|----------|----------|----------|-------|
| Spirodiclofen      | 411.1124 | 313.0391 | 295.0286 | 230.9610 | 71.0856  |          |          |          | 10.58 |
| Spiromesifen       | 371.2217 | 255.1379 | 227.1430 | 187.0754 |          |          |          |          | 10.29 |
| Spirotetramat      | 374.1962 | 330.2064 | 302.1752 | 298.1803 | 270.1489 | 244.1333 |          |          | 7.73  |
| Spiroxamine        | 298.2741 | 144.1384 | 100.1120 | 72.0808  | 58.0654  |          |          |          | 7.32  |
| Tebuconazole       | 308.1524 | 125.0155 | 70.0402  |          |          |          |          |          | 8.5   |
| Tebufenozide       | 353.2224 | 297.1600 | 203.1546 | 133.0650 | 123.0806 | 72.0809  |          |          | 8.27  |
| Tebufenpyrad       | 334.1681 | 171.0321 | 147.1169 | 145.0528 |          |          |          |          | 9.71  |
| Terbuthylazine     | 230.1167 | 174.0543 | 96.0557  | 79.0058  |          |          |          |          | 7.22  |
| Tetraconazole      | 372.0288 | 184.9922 | 176.9670 | 158.9764 | 70.0401  |          |          |          | 7.94  |
| Thiabendazole      | 202.0433 | 175.0324 | 131.0604 | 65.0386  |          |          |          |          | 4.5   |
| Thiacloprid        | 253.0309 | 211.0092 | 186.0140 | 126.0106 |          |          |          |          | 4.8   |
| Thiamethoxam       | 292.0266 | 246.0339 | 211.0650 | 181.0544 | 131.9671 |          |          |          | 3.95  |
| Thiobencarb        | 258.0714 | 125.0153 | 100.0757 | 72.0444  |          |          |          |          | 9.02  |
| Thiodicarb         | 355.0563 | 107.9937 | 88.0216  | 78.9671  | 72.9981  | 62.0062  |          |          | 6.06  |
| Thiophanate-methyl | 343.0529 | 311.0268 | 268.0210 | 235.9948 | 226.0646 | 160.0507 | 151.0326 |          | 5.36  |
| Tolclofos-methyl   | 300.9616 | 286.9458 | 174.9712 | 142.9926 | 127.0154 |          |          |          | 9.03  |
| Triadimefon        | 294.1004 | 225.0676 | 197.0728 | 115.0754 | 69.0700  | 57.0702  |          |          | 7.5   |
| Triadimenol        | 296.116  | 209.0713 | 99.0811  | 70.0408  | 57.0709  | 156.0811 | 183.0920 | 227.0819 | 7.65  |
| Triazophos         | 314.0723 | 286.0409 | 178.0434 | 162.0662 | 114.9614 |          |          |          | 7.76  |
| Trichlorfon        | 256.9299 | 220.9534 | 144.9818 | 127.0156 | 93.0101  | 78.9944  |          |          | 4.36  |
| Trifloxystrobin    | 409.137  | 206.0814 | 186.0527 | 134.0601 | 131.0731 | 116.0496 |          |          | 9.24  |
| Triflumuron        | 359.0405 | 178.0476 | 156.0212 | 138.9947 | 113.0153 |          |          |          | 8.9   |
| Triticonazole      | 318.1368 | 191.0625 | 125.0155 | 70.0401  |          |          |          |          | 7.81  |
| Zoxamide           | 336.0319 | 203.9981 | 186.9715 | 132.0577 |          |          |          |          | 8.67  |
